# Supplementary material for: Computational Discovery of TTF Molecules with Deep Generative Models
Source: Front Chem. 2021 Dec 23;9:800133. doi: 10.3389/fchem.2021.800133 (PMC8733737; doi:10.3389/fchem.2021.800133)
Supplement: Supplementary file 5 [file DataSheet2.CSV]

SMILES	S1	T1	T2
CC(C)(C)C12CC=c3oncc3=C1OC=N2	3.125720822991019	1.5978832817750728	3.1406132132068056
CC(C)(C)C1=c2ccc3cocc3c2=C2C=NC=CN2O1	3.17452001	1.61300666032	3.1461484629
CC(C)(C)c1c2ccccc2c2oncn12	2.8526125769974646	1.593728425941509	3.294502681196112
CC(C)(C)c1c2cccnc2c2oncn12	2.97129868679	1.69914001779	3.40806418257
CC(C)(C)c1c2cnccc2cc2nn(-c3ccccc3)cc12	2.70084197705	1.40318644072	2.72602861727
CC(C)(C)c1c2conc2cc2ncn(-c3ccccc3)c12	2.83247181827	1.50242357429	2.96812887065
CC(C)(C)c1c2ncccc2c2oncn12	2.992386422727869	1.7519325519118234	3.461495925275888
CC(C)(C)c1c2nocc2cc2ncn(-c3ccccc3)c12	2.81902474097	1.49283544544	2.99705305934
CC(C)(C)c1cc2c(c3cocc13)-c1cncn1C2	2.776854395029766	1.4006874318282363	2.735834373729224
CC(C)(C)c1cc2c(c3cocc13)-c1nccn1C2	2.751286008615667	1.4163480422778232	2.775784910590414
CC(C)(C)c1cc2c(c3cocc13)-n1cncc1OC2	2.8711733315795507	1.4906560408396374	2.8933992911097595
CC(C)(C)c1cc2c(c3cocc13)C1C=COCN1N2c1ccccc1	3.061894554683233	1.4834649442046233	2.9846463173007183
CC(C)(C)c1cc2c(c3cocc13)C1OC=CCN1N2c1ccccc1	3.072879491068549	1.5074352663213373	3.005580398615982
CC(C)(C)c1cc2c(c3cocc13)COc1cncn1-2	3.041061054642116	1.5160645822833547	2.946293801913975
CC(C)(C)c1cc2c(c3cocc13)N(c1ccccc1)CO2	2.84617313153021	1.3904600943917715	2.8448194382865517
CC(C)(C)c1cc2c(c3cocc13)N(c1ccccc1)N(c1ccccc1)C2	2.964166499944901	1.4636494779214724	2.931272400054168
CC(C)(C)c1cc2c(c3cocc13)N(c1ccccc1)N1C=CCOC21	2.952234586284989	1.4725983981783792	2.91689020678414
CC(C)(C)c1cc2c(c3cocc13)N(c1ccccc1)N1CC=COC21	2.96454529085474	1.4813875162878412	2.941499737490633
CC(C)(C)c1cc2c(c3cocc13)N(c1ccccc1)N1COC=CC21	2.924961640776617	1.4516643168631156	2.879496504282065
CC(C)(C)c1cc2c(c3cocc13)N(c1ccccc1)OC21C=NC=N1	2.791248449603629	1.474835628242606	2.8962757297637647
CC(C)(C)c1cc2c(c3nocc13)OCN2c1ccccc1	2.729316135845034	1.414270614361041	2.8860483923273
CC(C)(C)c1cc2c(oc3cccn32)c2cocc12	2.9823484636171487	1.5226164703285898	2.9867237452175
CC(C)(C)c1cc2c(oc3ccnn32)c2cocc12	3.0480686864741275	1.5502622418365335	3.027792897110804
CC(C)(C)c1cc2c(oc3cncn32)c2cocc12	3.034432213719942	1.5328438077650546	3.004781387878758
CC(C)(C)c1cc2c(oc3nccn32)c2cocc12	3.048826268293805	1.5451485731183014	3.0319477529443684
CC(C)(C)c1cc2c(on3ccnc23)c2cocc12	2.76637280448	1.41469219534	2.82654416801
CC(C)(C)c1cc2cnc3cc4cocc4nc3c2n1-c1ccccc1	2.74553930444	1.35204975354	2.69822304362
CC(C)(C)c1cc2coc3cnoc(n1)c23	2.87489640019	1.3983923763	2.81887366494
CC(C)(C)c1cc2cocc2c2c1-n1cncc1OC2	3.052045991027432	1.477552264749167	2.8940384996995383
CC(C)(C)c1cc2cocc2c2c1=C1C=NC=CN1OC=2	2.83171423645	1.51153229669	3.11434783556
CC(C)(C)c1cc2cocc2c2c1C1OC=CCN1N2c1ccccc1	2.9865151636253726	1.4631700714791382	2.926478335630825
CC(C)(C)c1cc2cocc2c2c1CN(c1ccccc1)N2c1ccccc1	3.030644304621557	1.4762738475696089	2.9526858878117657
CC(C)(C)c1cc2cocc2c2c1COc1cncn1-2	2.9304541089692755	1.489377623660079	2.8938786975520934
CC(C)(C)c1cc2cocc2c2c1Cn1ccnc1-2	2.8181426042021616	1.4289724119259593	2.784094622257542
CC(C)(C)c1cc2cocc2c2c1Cn1cncc1-2	2.8456049451654524	1.4144304165084858	2.739989229562788
CC(C)(C)c1cc2cocc2c2c1OCN2c1ccccc1	2.9026129770961457	1.4021256511552391	2.844659636139107
CC(C)(C)c1cc2cocc2c2c1On1cccc1C2	3.119091982068845	1.5683198844977917	3.038979047431938
CC(C)(C)c1cc2cocc2c2c1On1cncc1C2	3.176100013999539	1.5723149381839108	3.0463299462143967
CC(C)(C)c1cc2cocc2c2c1n(-c1ccccc1)n1ccnc21	2.71542542709	1.37234462627	2.71596108199
CC(C)(C)c1cc2cocc2c2c1n(-c1ccccc1)n1cncc21	2.72072849983	1.34581746979	2.64420991779
CC(C)(C)c1cc2cocc2c2c1oc1cccn12	2.9278025726004056	1.5232556789183689	2.961634808068673
CC(C)(C)c1cc2cocc2c2c1oc1ccnn12	2.95084397765	1.51776458044	2.96621124488
CC(C)(C)c1cc2cocc2c2c1oc1cncn12	3.008295640941085	1.5401947065475137	2.9996677191605263
CC(C)(C)c1cc2cocc2c2c1oc1nccn12	3.0141669000435827	1.545947583855525	3.009096045859767
CC(C)(C)c1cc2cocc2c2oc3cccn3c12	3.0118941545845512	1.5254929089825957	2.980970867909489
CC(C)(C)c1cc2cocc2c2oc3ccnn3c12	3.0834856365440277	1.5515406590160918	3.025875271341467
CC(C)(C)c1cc2cocc2c2oc3cncn3c12	3.066818836511133	1.5361996528613946	3.003662772846645
CC(C)(C)c1cc2cocc2c2oc3nccn3c12	3.0791295410808845	1.5456279795606356	3.029710522880141
CC(C)(C)c1cc2ncc3cc4conc4cc3c2cn1	2.72773613166	1.40015019992	2.81631683058
CC(C)(C)c1cc2oc3cccn3c2c2cocc12	2.857347463370446	1.5067960577315584	2.942138946080412
CC(C)(C)c1cc2oc3cncn3c2c2cocc12	2.93285140943	1.48979920464	2.94735459149
CC(C)(C)c1cc2oc3nccn3c2c2cocc12	2.942386022629188	1.5317251927329414	2.982888493678826
CC(C)(C)c1ccc2c(c1)ncc1cc3conc3cc12	2.721550922193346	1.4235391389128371	2.76923302254518
CC(C)(C)c1ccc2c(c1)ncc1cc3nocc3cc12	2.700906817607148	1.3771965161538564	2.7601243001408275
CC(C)(C)c1ccc2c(cnc3cc4conc4cc32)c1	2.717384222185122	1.3950943566676697	2.79544057472612
CC(C)(C)c1ccc2c(cnc3cc4nocc4cc32)c1	2.724770644926973	1.3952541588151144	2.8037502863932477
CC(C)(C)c1ccc2c(ncc3cc4conc4cc32)n1	2.7329146494885004	1.4382409364777553	2.831076453606302
CC(C)(C)c1ccc2c(ncc3cc4nocc4cc32)n1	2.7253388312917304	1.3949345545202247	2.8272412020676274
CC(C)(C)c1ccc2cnc3cc4conc4cc3c2c1	2.714732685816253	1.3950943566676697	2.791285718892556
CC(C)(C)c1ccc2cnc3cc4conc4cc3c2n1	2.7268539949310844	1.395413960962559	2.8312362557537463
CC(C)(C)c1ccc2cnc3cc4nocc4cc3c2c1	2.71997091801	1.3606790695	2.76262330904
CC(C)(C)c1ccc2cnc3cc4nocc4cc3c2n1	2.733293440398339	1.43536449782375	2.849293898415005
CC(C)(C)c1ccc2ncc3cc4conc4cc3c2c1	2.7230660858327	1.4265753797142875	2.7614027173203857
CC(C)(C)c1ccc2ncc3cc4nocc4cc3c2c1	2.705831099435048	1.378794537628304	2.7489381498196943
CC(C)(C)c1ccc2ncc3cc4nocc4cc3c2n1	2.718899385824476	1.4134716036238173	2.7978376069377915
CC(C)(C)c1cccc2c1-n1cnc3ncn-2c31	2.78474416361	1.46055541166	2.86905153924
CC(C)(C)c1cccc2c1cnc1cc3conc3cc12	2.709240217623595	1.3861454364107628	2.7794603599816434
CC(C)(C)c1cccc2c1cnc1cc3nocc3cc12	2.722119108558103	1.3891816772122134	2.7863318523217684
CC(C)(C)c1cccc2c1ncc1cc3conc3cc12	2.714164499451494	1.415549031540599	2.7495773584094736
CC(C)(C)c1ccnc2c1cnc1cc3conc3cc12	2.719467572189234	1.3855062278209838	2.82899902568952
CC(C)(C)c1ccnc2c1ncc1cc3nocc3cc12	2.7090508221686758	1.405641298399024	2.797358200495457
CC(C)(C)c1cnc2cnc3cc4conc4cc3c2c1	2.705831099435048	1.394614950225335	2.831076453606302
CC(C)(C)c1cnc2cnc3cc4nocc4cc3c2c1	2.7230660858327	1.3936561373406668	2.835231309439866
CC(C)(C)c1cnc2ncc3cc4conc4cc3c2c1	2.72287669037778	1.431209641990186	2.809982570143593
CC(C)(C)c1cnc2ncc3cc4nocc4cc3c2c1	2.710565985808029	1.3818307784297543	2.794002355399117
CC(C)(C)c1cncc2c1cnc1cc3conc3cc12	2.7200357585539923	1.3979707953216751	2.8440204275493275
CC(C)(C)c1cncc2c1cnc1cc3nocc3cc12	2.7230660858327	1.394295345930446	2.844340031844217
CC(C)(C)c1cncc2c1ncc1cc3cocc3nc12	2.86144932289	1.42827537787	2.78867105907
CC(C)(C)c1cncc2c1ncc1cc3nocc3cc12	2.708103844894078	1.379273944070638	2.815096238861825
CC(C)(C)c1nc2cc3cocc3nc2c2cccnc12	2.8588626270098	1.42497735823984	2.821168720464726
CC(C)(C)c1nc2cc3cocc3nc2c2ccncc12	2.856968672460608	1.4235391389128371	2.7984768155275708
CC(C)(C)c1nc2cc3cocc3nc2c2cnccc12	2.855453508821254	1.4278537968938458	2.8288392235420754
CC(C)(C)c1nc2cc3nocc3cc2c2ccncc12	2.720793340373669	1.389341479359658	2.8489742941201155
CC(C)(C)c1nc2cc3nocc3cc2o1	3.041629241006873	1.5662424565810098	3.06119154592676
CC(C)(C)c1nc2ccncc2c2cc3cocc3nc12	2.8501504360835144	1.4484682739142205	2.806786527194698
CC(C)(C)c1nc2cnccc2c2cc3conc3cc12	2.709429613078514	1.3941355437830012	2.7794603599816434
CC(C)(C)c1nc2coc3cnc4coc1c4c23	2.80690343185	1.3795357229	2.67808797304
CC(C)(C)c1nc2nc3cocc3cc2o1	3.23967204652	1.62611043641	3.16708254422
CC(C)(C)c1nccc2c1cnc1cc3conc3cc12	2.713406917631818	1.3904600943917715	2.837788143798982
CC(C)(C)c1nccc2c1ncc1cc3conc3cc12	2.727422181295842	1.4214617109960552	2.8016728584764654
CC(C)(C)c1nccc2c1ncc1cc3nocc3cc12	2.7327252540335816	1.3952541588151144	2.7949611682837854
CC(C)(C)c1occ2c1ccc1oc3cncn3c12	2.914923681665897	1.5024813997505495	2.961155401626338
CC(C)(C)c1occ2c1ccc1oc3nccn3c12	2.9154918680306547	1.5093528920906747	2.9673876853766843
CC(C)(C)c1occ2c3c(ccc12)CN(c1ccccc1)N3c1ccccc1	2.952423981739908	1.4454320331127697	2.906662869347674
CC(C)(C)c1occ2c3c(ccc12)CN=CO3	3.111137372962237	1.527730139046822	2.9600367865942245
CC(C)(C)c1occ2c3c(ccc12)OC=NC3	3.1459861366673785	1.526611524014709	2.9884815688393926
CC(C)(C)c1occ2c3c(ccc12)ON(c1ccccc1)C3	2.732535858578662	1.4780316711915011	2.857284005787243
CC(C)(C)c1occ2c3c(ccc12)ON=CC3	3.2014790049587183	1.5515406590160918	3.005420596468537
CC(C)(C)c1occ2cc3c(cc12)N(c1ccccc1)Cc1nnccc1-3	2.909810004383077	1.467165125165257	2.8577634122295774
CC(C)(C)c1occ2cc3c(cc12)c1cccnc1n3-c1ccccc1	2.8079152496365225	1.4395193536573134	2.8066267250472534
CC(C)(C)c1occ2cc3c(cc12)c1ccncc1n3-c1ccccc1	2.84636252698513	1.4542211512222314	2.8307568493114124
CC(C)(C)c1occ2cc3c(cc12)c1ccnnc1n3-c1ccccc1	2.712081149447383	1.4241783475026162	2.7828162050779834
CC(C)(C)c1occ2cc3c(cc12)c1cnccc1n3-c1ccccc1	2.86694179108	1.4206048748	2.82654416801
CC(C)(C)c1occ2cc3c(cc12)c1cncnc1n3-c1ccccc1	2.7874605405052435	1.4388801450675346	2.891162061045532
CC(C)(C)c1occ2cc3c(cc12)c1cnncc1n3-c1ccccc1	2.813218322374261	1.4567779855813476	2.8716661990572714
CC(C)(C)c1occ2cc3c(cc12)c1ncncc1n3-c1ccccc1	2.8243926542144973	1.4759542432747192	2.860000642293804
CC(C)(C)c1occ2cc3c(cc12)n(-c1ccccc1)c1ccnn31	2.874961240677936	1.4909756451345269	2.90314722210389
CC(C)(C)c1occ2cc3c(cc12)n(-c1ccccc1)c1nccn31	2.828180563312882	1.4793100883710593	2.915292185309691
CC(C)(C)c1occ2cc3c(cnc4cnccc43)nc12	2.736513163131966	1.397651191026786	2.802951275656024
CC(C)(C)c1occ2cc3c4cncnc4n(-c4ccccc4)c3cc12	2.7860699318	1.39935118919	2.8433233935
CC(C)(C)c1occ2cc3c4cnncc4n(-c4ccccc4)c3cc12	2.80917617731	1.41517160179	2.8244667401
CC(C)(C)c1occ2cc3c4nnccc4n(-c4ccccc4)c3cc12	2.82186567279	1.42699696069	2.78004174311
CC(C)(C)c1occ2cc3cnc4ccncc4c3nc12	2.745414749513171	1.4105951649698116	2.8441802296967724
CC(C)(C)c1occ2cc3cnc4cnccc4c3nc12	2.753748149529618	1.4086775392004742	2.7866514566166583
CC(C)(C)c1occ2cc3cnc4ncccc4c3nc12	2.756399685898487	1.4112343735595905	2.817812875368386
CC(C)(C)c1occ2cc3ncc4ccncc4c3nc12	2.7507178222509103	1.3990894103537883	2.834911705144976
CC(C)(C)c1occ2cc3ncc4ncccc4c3nc12	2.753683309	1.36035946521	2.7867534333
CC(C)(C)c1occ2cc3oc4ncncc4c3cc12	3.04592049606	1.50561961723	2.94687518504
CC(C)(C)c1occ2ccc3c(c12)N(c1ccccc1)c1ccccc1O3	2.77129708631	1.44409579047	2.78931026766
CC(C)(C)c1occ2ccc3c(c12)n(-c1ccccc1)n1ccnc31	2.7767895545	1.38576800665	2.73433832894
CC(C)(C)c1occ2nc3c(cc12)ncc1ccncc13	2.7539375449845367	1.4034040683347977	2.8395459674208747
CC(C)(C)c1occ2nc3c(cc12)ncc1cnccc13	2.756399685898487	1.3998884210910123	2.811260987323152
CC(C)(C)c1occ2nc3c(cc12)ncc1ncccc13	2.765111876824772	1.40148644256546	2.8286794213946305
CC(C)(C)c1occ2nc3c(cnc4cccnc43)cc12	2.7635967131854184	1.4179460637522705	2.793203344661894
CC(C)(C)c1occ2nc3c(cnc4ccncc43)cc12	2.7560208949886484	1.4200234916690526	2.850572315594563
CC(C)(C)c1occ2nc3c(cnc4cnccc43)cc12	2.756778476808325	1.4161882401303785	2.790806312450222
CC(C)(C)c1occ2nc3cnc4ccncc4c3cc12	2.7217403176482646	1.3918983137187744	2.819410896842834
CC(C)(C)c1occ2nc3cnc4cnccc4c3cc12	2.737649535861481	1.4011668382705706	2.804868901425361
CC(C)(C)c1onc2c1-c1occ3ccnc-2c13	2.79894882274	1.37761809713	2.71100721541
CC(C)(C)c1onc2c1-c1occ3nccc-2c13	2.76788796812	1.40078940851	2.70317691019
CC(C)(C)c1onc2c3cccc4coc(c43)n(-c3ccccc3)c12	2.71731938164	1.32712061854	2.58811936403
CC(C)(C)c1onc2cc3ncoc3cc12	2.98152604136	1.51472833964	3.02342041367
Cc1cc(-c2cc3c(c4cocc24)N(c2ccccc2)N(c2ccccc2)C3)cc(C)c1C	2.806778876907007	1.4403183643945372	2.8421028017799905
Cc1cc(-c2cc3c(c4cocc24)OCN3c2ccccc2)cc(C)c1C	2.8175744178374043	1.3789543397757489	2.8305970471639674
Cc1cc(-c2cnc3cnc4cc5nocc5cc4c3c2)cc(C)c1C	2.719656967644153	1.3974913888793412	2.749257754114584
Cc1cc(-c2cnc3ncc4cc5nocc5cc4c3c2)cc(C)c1C	2.7052629130702908	1.384867019231205	2.718735543952634
Cc1cc(-c2nccc3c2cnc2cc4conc4cc23)cc(C)c1C	2.713406917631818	1.394295345930446	2.8299578385741886
Cc1cc(-c2nccc3c2ncc2cc4nocc4cc23)cc(C)c1C	2.739354094955755	1.402764859745018	2.8066267250472534
Cc1cc(C)c(-c2c3cnoc3cc3conc23)c(C)c1	2.8823476634197864	1.5058372448468895	2.9498094491577604
Cc1cc(C)c(-c2c3cocc3cc3c2ncn3-c2ccccc2)c(C)c1	2.73802832677132	1.3295754762153174	2.7914455210400013
Cc1cc(C)c(-c2c3conc3cc3cnoc23)c(C)c1	2.85406290014	1.46135442239	2.91123930616
Cc1cc(C)c(-c2cc3c(c4cocc24)-c2cncn2C3)c(C)c1	2.7183311994597186	1.4000482232384577	2.7436646789540173
Cc1cc(C)c(-c2cc3c(c4cocc24)-n2cncc2OC3)c(C)c1	2.819657767841516	1.490336436544748	2.900909992039663
Cc1cc(C)c(-c2cc3c(c4cocc24)C2(C=COC=N2)N(c2ccccc2)N3c2ccccc2)c(C)c1	3.0956069456588584	1.519100823084805	2.9435771654074143
Cc1cc(C)c(-c2cc3c(c4cocc24)C2OC=CCN2N3c2ccccc2)c(C)c1	3.02988672280188	1.505997046994335	2.9440565718497487
Cc1cc(C)c(-c2cc3c(c4cocc24)CN(c2ccccc2)N3c2ccccc2)c(C)c1	3.051288409207755	1.4805885055506174	2.944855582586973
Cc1cc(C)c(-c2cc3c(c4cocc24)CN(c2ccccc2)N3c2ccccc2)cc1C	3.0457959410150965	1.4786708797812802	2.9339890365607286
Cc1cc(C)c(-c2cc3c(c4cocc24)N(c2ccccc2)CO3)c(C)c1	2.791437845058548	1.3883826664749896	2.849293898415005
Cc1cc(C)c(-c2cc3c(c4cocc24)N(c2ccccc2)CO3)cc1C	2.7867029586855665	1.3861454364107628	2.8508919198894525
Cc1cc(C)c(-c2cc3c(c4cocc24)N(c2ccccc2)N(c2ccccc2)C3)c(C)c1	2.9060220952846927	1.4623710607419145	2.9347880472979524
Cc1cc(C)c(-c2cc3c(c4cocc24)N(c2ccccc2)N(c2ccccc2)C3)cc1C	2.902423581641227	1.4625308628893592	2.9280763571052724
Cc1cc(C)c(-c2cc3c(c4cocc24)N(c2ccccc2)N(c2ccccc2)C32C=COC=N2)c(C)c1	2.9526133771948277	1.49209426016664	2.939422309573851
Cc1cc(C)c(-c2cc3c(c4cocc24)N(c2ccccc2)N2CC=COC32)c(C)c1	2.9045069316453387	1.4801090991082828	2.935587058035176
Cc1cc(C)c(-c2cc3c(cn2)cnc2cc4conc4cc23)c(C)c1	2.711323567627706	1.394614950225335	2.8357107158822
Cc1cc(C)c(-c2cc3c(cn2)cnc2cc4nocc4cc23)c(C)c1	2.742195026779544	1.4158686358354888	2.850572315594563
Cc1cc(C)c(-c2cc3c(cn2)ncc2cc4conc4cc23)c(C)c1	2.729316135845034	1.427054786156622	2.800873847739242
Cc1cc(C)c(-c2cc3c(cn2)ncc2cc4nocc4cc23)c(C)c1	2.731778276758985	1.4002080253859022	2.794801366136341
Cc1cc(C)c(-c2cc3c(oc4cccn43)c3cocc23)c(C)c1	2.9397344862603183	1.5194204273796947	2.991677611788288
Cc1cc(C)c(-c2cc3c(on4ccnc34)c3cocc23)c(C)c1	2.792006031423305	1.4518241190105603	2.868150551813487
Cc1cc(C)c(-c2cc3cocc3c3c2C2(C=COC=N2)N(c2ccccc2)N3c2ccccc2)c(C)c1	3.0260988137034954	1.4797894948133934	2.935427255887732
Cc1cc(C)c(-c2cc3cocc3c3c2CN(c2ccccc2)N3c2ccccc2)c(C)c1	2.999015263650043	1.470840574556487	2.9403811224585192
Cc1cc(C)c(-c2cc3cocc3c3c2CN(c2ccccc2)N3c2ccccc2)cc1C	3.004318336387781	1.4738768153579376	2.936066464477511
Cc1cc(C)c(-c2cc3cocc3c3c2Cn2ccnc2-3)c(C)c1	2.800528826894672	1.4275341925989562	2.790806312450222
Cc1cc(C)c(-c2cc3cocc3c3c2Cn2cncc2-3)c(C)c1	2.8278017724030438	1.413631405771262	2.7486185455248044
Cc1cc(C)c(-c2cc3cocc3c3c2Cn2cncc2-3)cc1C	2.8323472633211053	1.41490982295082	2.7486185455248044
Cc1cc(C)c(-c2cc3cocc3c3c2N(c2ccccc2)c2cn(-c4ccccc4)cc2O3)c(C)c1	2.80103217274	1.42923419076	2.75894785965
Cc1cc(C)c(-c2cc3cocc3c3c2OCN3c2ccccc2)c(C)c1	2.8738248679484206	1.3939757416355565	2.846417459760999
Cc1cc(C)c(-c2cc3cocc3c3c2oc2cccn23)c(C)c1	2.89655232253873	1.5120695285972354	2.9470928126511997
Cc1cc(C)c(-c2cc3cocc3c3c2oc2cccn23)cc1C	2.89655232253873	1.511590122154901	2.9386232988366268
Cc1cc(C)c(-c2cc3cocc3c3c2on2ccnc32)cc1C	2.800718222349591	1.453262338337563	2.8274010042150723
Cc1cc(C)c(-c2cc3cocc3c3c2on2cncc32)c(C)c1	2.716247849455607	1.4246577539449503	2.761083113025496
Cc1cc(C)c(-c2cc3cocc3c3oc4cccn4c23)c(C)c1	2.994280377277061	1.5240546896555929	2.987203151659835
Cc1cc(C)c(-c2cc3ncc4cc5nocc5cc4c3cn2)c(C)c1	2.7062098903448866	1.3832689977567572	2.831715662196081
Cc1cc(C)c(-c2cc3oc4cccn4c3c3cocc23)c(C)c1	2.804127340538138	1.504878431962221	2.941020331048298
Cc1cc(C)c(-c2cc3oc4cccn4c3c3cocc23)cc1C	2.7988242678003985	1.5032804104877735	2.9314322022016124
Cc1cc(C)c(-c2cc3oc4ccnn4c3c3cocc23)c(C)c1	2.82375962734	1.50242357429	2.90980108683
Cc1cc(C)c(-c2cc3on4ccnc4c3c3cocc23)c(C)c1	2.702421981246502	1.4463908459974382	2.8261225870355147
Cc1cc(C)c(-c2cc3on4cncc4c3c3cocc23)c(C)c1	2.701096213062067	1.4179460637522705	2.7644389581218363
Cc1cc(C)c(-c2ccc3c(c2)ncc2cc4conc4cc23)c(C)c1	2.7295055312999543	1.4294518183682936	2.770511439724737
Cc1cc(C)c(-c2ccc3c(c2)ncc2cc4nocc4cc23)c(C)c1	2.706020494889968	1.3797533505129724	2.7586860808138245
Cc1cc(C)c(-c2ccc3c(cnc4cc5conc5cc43)c2)c(C)c1	2.7243918540171346	1.3987698060588991	2.7962395854633435
Cc1cc(C)c(-c2ccc3c(cnc4cc5conc5cc43)n2)c(C)c1	2.717384222185122	1.4029246618924631	2.847216470498223
Cc1cc(C)c(-c2ccc3c(cnc4cc5nocc5cc43)c2)c(C)c1	2.7266645994761656	1.3973315867318965	2.802631671361134
Cc1cc(C)c(-c2ccc3c(cnc4cc5nocc5cc43)n2)c(C)c1	2.726475204021246	1.3987698060588991	2.8502527112996736
Cc1cc(C)c(-c2ccc3c(ncc4cc5conc5cc43)n2)c(C)c1	2.72432701347	1.40270703428	2.79442393638
Cc1cc(C)c(-c2ccc3c(ncc4cc5conc5cc43)n2)cc1C	2.734051022218016	1.439199749362424	2.8261225870355147
Cc1cc(C)c(-c2ccc3c(ncc4cc5nocc5cc43)n2)c(C)c1	2.70387230433	1.3512507428	2.77892312808
Cc1cc(C)c(-c2ccc3c(ncc4cc5nocc5cc43)n2)cc1C	2.7122705449023026	1.3874238535903212	2.8111011851757066
Cc1cc(C)c(-c2ccc3cnc4cc5conc5cc4c3c2)c(C)c1	2.719846363099073	1.3984502017640097	2.7917651253348907
Cc1cc(C)c(-c2ccc3cnc4cc5conc5cc4c3n2)c(C)c1	2.726285808566327	1.3971717845844516	2.830117640721633
Cc1cc(C)c(-c2ccc3cnc4cc5nocc5cc4c3c2)c(C)c1	2.7327252540335816	1.3997286189435678	2.7978376069377915
Cc1cc(C)c(-c2ccc3cnc4cc5nocc5cc4c3n2)c(C)c1	2.731778276758985	1.4388801450675346	2.8488144919726706
Cc1cc(C)c(-c2ccc3cnc4cc5nocc5cc4c3n2)cc1C	2.7302631131196318	1.4382409364777553	2.843381218959548
Cc1cc(C)c(-c2ccc3ncc4cc5conc5cc4c3c2)c(C)c1	2.724770644926973	1.4267351818617326	2.761242915172941
Cc1cc(C)c(-c2ccc3ncc4cc5conc5cc4c3c2)cc1C	2.724770644926973	1.427693994746401	2.75852627866638
Cc1cc(C)c(-c2ccc3ncc4cc5conc5cc4c3n2)c(C)c1	2.740111676775432	1.4224205238807242	2.8016728584764654
Cc1cc(C)c(-c2ccc3ncc4cc5nocc5cc4c3c2)c(C)c1	2.709619008533433	1.3818307784297543	2.749417556262028
Cc1cc(C)c(-c2ccc3ncc4cc5nocc5cc4c3n2)c(C)c1	2.719088781279396	1.417626459457381	2.7991160241173496
Cc1cc(C)c(-c2ccc3ncc4coc5oc2c3c45)c(C)c1	2.76788796812	1.34421944832	2.63893644691
Cc1cc(C)c(-c2cccc3c2cnc2cc4conc4cc23)c(C)c1	2.7192781767343144	1.3958933674048932	2.790806312450222
Cc1cc(C)c(-c2cccc3c2ncc2cc4conc4cc23)c(C)c1	2.725907017656489	1.4251371603872849	2.7599644979933826
Cc1cc(C)c(-c2cccc3c2ncc2cc4nocc4cc23)c(C)c1	2.711323567627706	1.3802327569553066	2.74845874337736
Cc1cc(C)c(-c2cccc3ncc4cc5nocc5cc4c23)c(C)c1	2.718899385824476	1.403723672629687	2.7422264596270143
Cc1cc(C)c(-c2ccnc3c2cnc2cc4conc4cc23)c(C)c1	2.726475204021246	1.3930169287508876	2.836989133061758
Cc1cc(C)c(-c2ccnc3c2cnc2cc4nocc4cc23)c(C)c1	2.7355661858573703	1.4374419257405315	2.8568045993449083
Cc1cc(C)c(-c2ccnc3c2ncc2cc4nocc4cc23)c(C)c1	2.7219297131031843	1.4166676465727126	2.8071061314895878
Cc1cc(C)c(-c2ccnc3ncc4cc5conc5cc4c23)c(C)c1	2.74806628588204	1.441117375131761	2.822926544086619
Cc1cc(C)c(-c2ccnc3ncc4cc5nocc5cc4c23)c(C)c1	2.725907017656489	1.4107549671172563	2.808384548669145
Cc1cc(C)c(-c2cn3oc4c5cocc5ccc4c3n2)c(C)c1	2.75178935445	1.44489480121	2.81743544561
Cc1cc(C)c(-c2cnc3c(c2)ncc2cc4conc4cc23)c(C)c1	2.741437444959866	1.4211421067011658	2.8072659336370327
Cc1cc(C)c(-c2cnc3c(c2)ncc2cc4nocc4cc23)c(C)c1	2.7143538949064143	1.4128323950340385	2.8037502863932477
Cc1cc(C)c(-c2cnc3c(cnc4cc5conc5cc43)c2)c(C)c1	2.7253388312917304	1.394295345930446	2.830916651458857
Cc1cc(C)c(-c2cnc3c(cnc4cc5nocc5cc43)c2)c(C)c1	2.725717622201569	1.4334468720544125	2.848494887677781
Cc1cc(C)c(-c2cnc3cnc4cc5conc5cc4c3c2)c(C)c1	2.710565985808029	1.3987698060588991	2.834432298702642
Cc1cc(C)c(-c2cnc3cnc4cc5nocc5cc4c3c2)c(C)c1	2.7268539949310844	1.3990894103537883	2.8387469566836505
Cc1cc(C)c(-c2cnc3ncc4cc5conc5cc4c3c2)c(C)c1	2.7295055312999543	1.4356841021186393	2.815096238861825
Cc1cc(C)c(-c2cnc3ncc4cc5conc5cc4c3c2)cc1C	2.724770644926973	1.4332870699069675	2.8085443508165904
Cc1cc(C)c(-c2cnc3ncc4cc5nocc5cc4c3c2)c(C)c1	2.714732685816253	1.3877434578852106	2.8002346391494632
Cc1cc(C)c(-c2cnc3oncc4occ2c43)c(C)c1	2.83379758645	1.40670208797	2.78867105907
Cc1cc(C)c(-c2cncc3c2cnc2cc4conc4cc23)c(C)c1	2.7219297131031843	1.4043628812194655	2.8480154812354472
Cc1cc(C)c(-c2cncc3c2cnc2cc4nocc4cc23)c(C)c1	2.731778276758985	1.402764859745018	2.8513713263317872
Cc1cc(C)c(-c2cncc3c2ncc2cc4conc4cc23)c(C)c1	2.741626840414785	1.439838957952203	2.8393861652734294
Cc1cc(C)c(-c2cncc3c2ncc2cc4nocc4cc23)c(C)c1	2.7185205949146374	1.3883826664749896	2.8226069397917293
Cc1cc(C)c(-c2cncc3cnc4cc5conc5cc4c23)c(C)c1	2.72016031346	1.36962798976	2.78643382901
Cc1cc(C)c(-c2cncc3ncc4cc5conc5cc4c23)c(C)c1	2.752801172255021	1.436483112855863	2.7924043339246696
Cc1cc(C)c(-c2cncc3ncc4cc5nocc5cc4c23)c(C)c1	2.744657167693494	1.4268949840091774	2.789208290975774
Cc1cc(C)c(-c2cncc3ncc4cc5nocc5cc4c23)cc1C	2.7437101904188976	1.4256165668296192	2.7890484888283296
Cc1cc(C)c(-c2nc3cc4cocc4nc3n2-c2ccccc2)c(C)c1	2.84440373194	1.44873005275	2.82222951003
Cc1cc(C)c(-c2nc3cc4nocc4cc3c3cn(-c4ccccc4)cc23)c(C)c1	2.74534990897	1.39551593764	2.70573374455
Cc1cc(C)c(-c2nc3nc4cocc4cc3n2-c2ccccc2)c(C)c1	2.899772045272357	1.5189410209373604	2.95684074364533
Cc1cc(C)c(-c2nccc3c2cnc2cc4conc4cc23)c(C)c1	2.714732685816253	1.39477475237278	2.8413037910427663
Cc1cc(C)c(-c2nccc3c2cnc2cc4nocc4cc23)c(C)c1	2.7484450767918784	1.4163480422778232	2.856644797197464
Cc1cc(C)c(-c2nccc3c2ncc2cc4conc4cc23)c(C)c1	2.7336722313081774	1.4281734011887353	2.8079051422268115
Cc1cc(C)c(-c2nccc3c2ncc2cc4nocc4cc23)c(C)c1	2.7382177222262394	1.4024452554501283	2.8021522649188
Cc1cc(C)c(-c2nccc3c2ncc2cc4nocc4cc23)cc1C	2.738407117681158	1.4024452554501283	2.804868901425361
Cc1cc(C)c(-c2nccc3cnc4cc5conc5cc4c23)c(C)c1	2.736513163131966	1.4137912079187067	2.8504125134471177
Cc1cc(C)c(-c2nccc3cnc4cc5nocc5cc4c23)c(C)c1	2.7327252540335816	1.4267351818617326	2.852649743511345
Cc1cc(C)c(-c2nccc3ncc4cc5conc5cc4c23)c(C)c1	2.75810424499276	1.4451124288178805	2.845938053318665
Cc1cc(C)c(-c2nccc3ncc4cc5nocc5cc4c23)c(C)c1	2.723255481287618	1.41155397785448	2.8286794213946305
Cc1cc(C)c(-c2nccc3ncc4cc5nocc5cc4c23)cc1C	2.724770644926973	1.4113941757070354	2.830117640721633
Cc1cc(C)c(-c2nccc3ncc4nc5cocc5cc4c23)c(C)c1	2.8639114638	1.42683715855	2.77988194096
Cc1cc(C)c(-c2occ3c2ccc2c3oc3ccnn32)c(C)c1	2.98455636864	1.49730990557	2.92530189514
Cc1cc(C)c(-c2occ3c2ccc2c3oc3cncn32)c(C)c1	2.9678895686	1.48164929512	2.92082743501
Cc1cc(C)c(-c2occ3c2ccc2c3oc3nccn32)c(C)c1	2.9899242818139187	1.5290085562263804	2.963073027395675
Cc1cc(C)c(-c2occ3c2ccc2oc4c(cnn4-c4ccccc4)c23)c(C)c1	2.84137340466	1.49251584115	2.88615036901
Cc1cc(C)c(-c2occ3c2ccc2oc4cccn4c23)c(C)c1	2.812271345099665	1.4924138644615297	2.924081303419153
Cc1cc(C)c(-c2occ3c2ccc2oc4ccnn4c23)c(C)c1	2.830074517862074	1.5246938982453715	2.954443711433658
Cc1cc(C)c(-c2occ3c2ccc2oc4cncn4c23)c(C)c1	2.88424161796898	1.5106313092702326	2.956361337202995
Cc1cc(C)c(-c2occ3c2ccc2oc4nccn4c23)c(C)c1	2.8823476634197864	1.5167037908731336	2.9585985672672224
Cc1cc(C)c(-c2occ3c4c(ccc23)-n2cncc2OC4)c(C)c1	2.983674231801584	1.4952903031155351	2.920405854027924
Cc1cc(C)c(-c2occ3c4c(ccc23)CN(c2ccccc2)N4c2ccccc2)c(C)c1	2.9134085180265425	1.448628076061665	2.911936340213351
Cc1cc(C)c(-c2occ3c4c(ccc23)OCN4c2ccccc2)c(C)c1	2.8048849223578145	1.3773563183013011	2.8131786130924885
Cc1cc(C)c(-c2occ3c4c(ccc23)ON(c2ccccc2)C4)cc1C	2.7313994858491464	1.4676445316075917	2.8569644014923536
Cc1cc(C)c(-c2occ3cc4c(cc23)N(c2ccccc2)Cc2nnccc2-4)c(C)c1	2.904885722555177	1.4644484886586966	2.8521703370690106
Cc1cc(C)c(-c2occ3cc4c(cc23)N=CCN4c2ccccc2)c(C)c1	3.0935235956547467	1.5028010040454394	2.9282361592527173
Cc1cc(C)c(-c2occ3cc4c(cc23)c2cccnc2n4-c2ccccc2)c(C)c1	2.76580461811	1.40766090085	2.77189183359
Cc1cc(C)c(-c2occ3cc4c(cc23)c2cccnc2n4-c2ccccc2)cc1C	2.723823667652377	1.429292016220849	2.7984768155275708
Cc1cc(C)c(-c2occ3cc4c(cc23)c2ccncc2n4-c2ccccc2)c(C)c1	2.815491067833292	1.4591750177930192	2.833473485817973
Cc1cc(C)c(-c2occ3cc4c(cc23)c2cnccc2n4-c2ccccc2)c(C)c1	2.83266121373	1.42603814781	2.82814218949
Cc1cc(C)c(-c2occ3cc4c(cc23)c2cnccc2n4-c2ccccc2)cc1C	2.7887863086896783	1.4484682739142205	2.8508919198894525
Cc1cc(C)c(-c2occ3cc4c(cc23)c2cncnc2n4-c2ccccc2)c(C)c1	2.7599981995419527	1.4449526266704356	2.8940384996995383
Cc1cc(C)c(-c2occ3cc4c(cc23)c2cnncc2n4-c2ccccc2)c(C)c1	2.7857559814109707	1.463809280068917	2.8740632312689427
Cc1cc(C)c(-c2occ3cc4c(cc23)n(-c2ccccc2)c2ccnn42)c(C)c1	2.832536658776024	1.4932128751987537	2.902188409219221
Cc1cc(C)c(-c2occ3cc4c(cc23)n(-c2ccccc2)c2ccnn42)cc1C	2.7846196086814547	1.4812277141403964	2.8839709644105183
Cc1cc(C)c(-c2occ3cc4c(cc23)n(-c2ccccc2)c2nccn42)c(C)c1	2.784430213226536	1.4813875162878412	2.911776538065906
Cc1cc(C)c(-c2occ3cc4c(cc23)n(-c2ccccc2)c2nccn42)cc1C	2.737270744951643	1.4686033444922602	2.882053338641181
Cc1cc(C)c(-c2occ3cc4c(cc23)n(-c2ccccc2)c2nncn42)c(C)c1	2.829316936042397	1.503759816930108	2.966748476786905
Cc1cc(C)c(-c2occ3cc4c(cc23)n(-c2ccccc2)c2nncn42)cc1C	2.70772505398424	1.4687631466397049	2.8716661990572714
Cc1cc(C)c(-c2occ3cc4c(cc23)n2cncc2n4-c2ccccc2)c(C)c1	2.867320582	1.48101008653	2.88311412821
Cc1cc(C)c(-c2occ3cc4c(cc23)ncc2cncn24)c(C)c1	2.788975704144598	1.370644628108621	2.678305600649109
Cc1cc(C)c(-c2occ3cc4c(cc23)oc2cncnc24)c(C)c1	3.020920296	1.50354218932	2.91779119421
Cc1cc(C)c(-c2occ3cc4c(cnc5ccccc54)nc23)c(C)c1	2.74067986314019	1.3963727738472276	2.7470205240503573
Cc1cc(C)c(-c2occ3cc4c(cnc5ccncc54)nc23)c(C)c1	2.7128387312670608	1.4005276296807916	2.822127533349396
Cc1cc(C)c(-c2occ3cc4c(cnc5cnccc54)nc23)c(C)c1	2.719656967644153	1.4067599134311373	2.8059875164574746
Cc1cc(C)c(-c2occ3cc4c(cnc5ncccc54)nc23)c(C)c1	2.7211721312835078	1.4026050575975733	2.799435628412239
Cc1cc(C)c(-c2occ3cc4c(ncn4-c4ccccc4)nc23)c(C)c1	2.76586945864445	1.4818669227301755	2.901709002776887
Cc1cc(C)c(-c2occ3cc4cnc5ccccc5c4nc23)c(C)c1	2.756778476808325	1.4145902186559305	2.75517043357004
Cc1cc(C)c(-c2occ3cc4cnc5cnccc5c4nc23)c(C)c1	2.73802832677132	1.4174666573099364	2.7890484888283296
Cc1cc(C)c(-c2occ3cc4cnn5cncc5c4cc23)c(C)c1	2.71921333619	1.31929031332	2.71963653138
Cc1cc(C)c(-c2occ3cc4ncc5ccccc5c4nc23)c(C)c1	2.776096813210089	1.4058011005464686	2.7794603599816434
Cc1cc(C)c(-c2occ3cc4ncc5ccncc5c4nc23)c(C)c1	2.734997999492612	1.407079517726027	2.839226363125985
Cc1cc(C)c(-c2occ3cc4ncc5ncccc5c4nc23)c(C)c1	2.747687494972201	1.4058011005464686	2.828359817099741
Cc1cc(C)c(-c2occ3ccc4c(c23)N(c2ccccc2)c2cn(-c3ccccc3)cc2O4)c(C)c1	2.71087993617	1.41852744688	2.74664309429
Cc1cc(C)c(-c2occ3ccc4c(c23)Oc2cn(-c3ccccc3)cc2O4)c(C)c1	2.7288725044	1.37250442842	2.68256243316
Cc1cc(C)c(-c2occ3ccc4c(oc5nccn54)c23)c(C)c1	2.92319224122	1.49986673993	2.93457041969
Cc1cc(C)c(-c2occ3nc4c(cc23)ncc2cnccc24)c(C)c1	2.71997091801	1.37170541768	2.77620649157
Cc1cc(C)c(-c2occ3nc4c(cnc5ccccc54)cc23)c(C)c1	2.74572869989	1.38720622598	2.72235316788
Cc1cc(C)c(-c2occ3nc4c(cnc5cnccc54)cc23)c(C)c1	2.7312100903942267	1.4265753797142875	2.792564136072114
Cc1cc(C)c(-c2occ3nc4cnc5ccccc5c4cc23)c(C)c1	2.7278009722056806	1.3966923781421174	2.7473401283452468
Cc1cc(C)c(-c2occ3nc4cnc5cnccc5c4cc23)c(C)c1	2.7115129630826256	1.4091569456428086	2.807425735784477
Cc1cc(C)c(-c2occ3nc4cnc5ncccc5c4cc23)c(C)c1	2.705831099435048	1.4016462447129048	2.7991160241173496
Cc1cc(C)c(-c2occ3nc4ncn(-c5ccccc5)c4cc23)c(C)c1	2.74894842262	1.44137915396	2.85722618033
Cc1cc(C)c(-c2onc3cc4cnoc4cc23)c(C)c1	2.84364615012	1.4701435405	2.93425081539
Cc1cc(C)c(C)c(-c2cc3c(c4cocc24)-c2cncn2C3)c1	2.723255481287618	1.4016462447129048	2.7455823047233543
Cc1cc(C)c(C)c(-c2cc3c(c4cocc24)CN(c2ccccc2)N3c2ccccc2)c1	3.0554551092159783	1.4825061313199543	2.94006151816363
Cc1cc(C)c(C)c(-c2cc3c(c4cocc24)Cn2ccnc2-3)c1	2.936514763526691	1.4256165668296192	2.8408243846004324
Cc1cc(C)c(C)c(-c2cc3c(c4cocc24)N(c2ccccc2)CN3)c1	2.776854395029766	1.4066001112836926	2.831396057901192
Cc1cc(C)c(C)c(-c2cc3c(c4cocc24)N(c2ccccc2)CO3)c1	2.796551522341368	1.388702270769879	2.8513713263317872
Cc1cc(C)c(C)c(-c2cc3c(c4cocc24)N(c2ccccc2)N(c2ccccc2)C3)c1	2.9120827498421087	1.4649278951010307	2.934148838708173
Cc1cc(C)c(C)c(-c2cc3c(c4cocc24)N(c2ccccc2)N(c2ccccc2)C32C=COC=N2)c1	2.962272545395709	1.4951305009680906	2.938942903131516
Cc1cc(C)c(C)c(-c2cc3c(cn2)ncc2cc4nocc4cc23)c1	2.7306419040294694	1.3992492125012332	2.7911259167451115
Cc1cc(C)c(C)c(-c2cc3c(oc4cccn43)c3cocc23)c1	2.944469372633299	1.5227762724760348	2.996471676211631
Cc1cc(C)c(C)c(-c2cc3cocc3c3c2C2(C=COC=N2)N(c2ccccc2)N3c2ccccc2)c1	3.064735486507022	1.4890580193651897	2.935427255887732
Cc1cc(C)c(C)c(-c2cc3cocc3c3c2C2C=COCN2N3c2ccccc2)c1	2.9537497499243424	1.4578966006134613	2.891641467487867
Cc1cc(C)c(C)c(-c2cc3cocc3c3c2C2OC=CCN2N3c2ccccc2)c1	2.996742518191012	1.486021778563739	2.933829234413284
Cc1cc(C)c(C)c(-c2cc3cocc3c3c2CN(c2ccccc2)N3c2ccccc2)c1	3.002803172748428	1.4729180024732689	2.934148838708173
Cc1cc(C)c(C)c(-c2cc3cocc3c3c2COc2cncn2-3)c1	2.910756981657673	1.4938520837885327	2.905704056463006
Cc1cc(C)c(C)c(-c2cc3cocc3c3c2Cn2ccnc2-3)c1	2.8056425041774915	1.4302508291055174	2.790806312450222
Cc1cc(C)c(C)c(-c2cc3cocc3c3c2Cn2cncc2-3)c1	2.8329154496858626	1.4152294272457095	2.749097951967139
Cc1cc(C)c(C)c(-c2cc3cocc3c3c2OCN3c2ccccc2)c1	2.87628700886237	1.3957335652574483	2.847216470498223
Cc1cc(C)c(C)c(-c2cc3cocc3c3c2oc2cccn23)c1	2.899772045272357	1.5135077479242385	2.9411801331957426
Cc1cc(C)c(C)c(-c2cc3cocc3c3c2on2cncc32)c1	2.7175736176400416	1.4267351818617326	2.7615625194678306
Cc1cc(C)c(C)c(-c2cc3cocc3c3oc4cccn4c23)c1	2.99731070455577	1.5264517218672642	2.9875227559547244
Cc1cc(C)c(C)c(-c2cc3oc4cccn4c3c3cocc23)c1	2.809619808730796	1.507115662026448	2.937185079509624
Cc1cc(C)c(C)c(-c2cc3on4ccnc4c3c3cocc23)c1	2.7054523085252096	1.4467104502923278	2.828519619247186
Cc1cc(C)c(C)c(-c2cc3on4cncc4c3c3cocc23)c1	2.701096213062067	1.4181058658997152	2.766516386038618
Cc1cc(C)c(C)c(-c2ccc3c(ncc4cc5conc5cc43)n2)c1	2.7348086040376924	1.4396791558047584	2.8274010042150723
Cc1cc(C)c(C)c(-c2ccc3c(ncc4cc5nocc5cc43)n2)c1	2.7135963130867378	1.3885424686224344	2.8125394045027097
Cc1cc(C)c(C)c(-c2ccc3cnc4cc5conc5cc4c3n2)c1	2.725149435836812	1.3966923781421174	2.8259627848880693
Cc1cc(C)c(C)c(-c2ccc3cnc4cc5nocc5cc4c3n2)c1	2.7313994858491464	1.4390399472149793	2.844659636139107
Cc1cc(C)c(C)c(-c2ccc3ncc4cc5conc5cc4c3n2)c1	2.7397328858655934	1.423059732470503	2.798157211232681
Cc1cc(C)c(C)c(-c2ccc3ncc4cc5nocc5cc4c3n2)c1	2.719467572189234	1.418904876636939	2.7963993876107884
Cc1cc(C)c(C)c(-c2ccnc3c2cnc2cc4conc4cc23)c1	2.7253388312917304	1.3918983137187744	2.837148935209203
Cc1cc(C)c(C)c(-c2cnc3cnc4cc5conc5cc4c3c2)c1	2.710565985808029	1.3992492125012332	2.831396057901192
Cc1cc(C)c(C)c(-c2cnc3cnc4cc5nocc5cc4c3c2)c1	2.727043390386004	1.3987698060588991	2.8368293309143136
Cc1cc(C)c(C)c(-c2cnc3ncc4cc5conc5cc4c3c2)c1	2.729126740390116	1.4363233107084183	2.8131786130924885
Cc1cc(C)c(C)c(-c2cnc3ncc4cc5nocc5cc4c3c2)c1	2.714922081271172	1.3874238535903212	2.799915034854574
Cc1cc(C)c(C)c(-c2occ3c4c(ccc23)CN(c2ccccc2)N4c2ccccc2)c1	2.8425746178867444	1.430410631252962	2.8312362557537463
Cc1cc(C)c(C)c(-c2occ3c4c(ccc23)COc2cncn2-4)c1	2.783672631406859	1.4642886865112517	2.8326744750807493
Cc1cc(C)c(C)c(-c2occ3c4c(ccc23)OCN4c2ccccc2)c1	2.760376990451791	1.3632937293261618	2.7748260977057457
Cc1cc(C)c(C)c(-c2occ3c4c(ccc23)ON(c2ccccc2)C4)c1	2.729316135845034	1.466685718722923	2.8556859843127955
Cc1cc(C)c(C)c(-c2occ3cc4c(cc23)N(c2ccccc2)Cc2nnccc2-4)c1	2.8774233815918864	1.447829065324441	2.821008918317282
Cc1cc(C)c(C)c(-c2occ3cc4c(cc23)N(c2ccccc2)c2c(ncn2-c2ccccc2)C4)c1	3.0615157637733943	1.4912952494294165	2.903626628546224
Cc1cc(C)c(C)c(-c2occ3cc4c(cc23)c2cccnc2n4-c2ccccc2)c1	2.728179763115519	1.42833320333618	2.7983170133801254
Cc1cc(C)c(C)c(-c2occ3cc4c(cc23)c2ccncc2n4-c2ccccc2)c1	2.76586945864445	1.4428751987536534	2.823246148381509
Cc1cc(C)c(C)c(-c2occ3cc4c(cc23)c2cnccc2n4-c2ccccc2)c1	2.774960440480573	1.4417565837215405	2.8429018125172143
Cc1cc(C)c(C)c(-c2occ3cc4c(cc23)c2cncnc2n4-c2ccccc2)c1	2.713406917631818	1.4289724119259593	2.867511343223708
Cc1cc(C)c(C)c(-c2occ3cc4c(cc23)c2cnncc2n4-c2ccccc2)c1	2.7374601404065624	1.4467104502923278	2.8576036100821325
Cc1cc(C)c(C)c(-c2occ3cc4c(cc23)c2ncncc2n4-c2ccccc2)c1	2.724770644926973	1.4577367984660166	2.843221416812104
Cc1cc(C)c(C)c(-c2occ3cc4c(cc23)n(-c2ccccc2)c2ccnn42)c1	2.7694679722879147	1.4740366175053825	2.870547584025158
Cc1cc(C)c(C)c(-c2occ3cc4c(cc23)n(-c2ccccc2)c2cncn42)c1	2.7709831359272696	1.4932128751987537	2.898992366270326
Cc1cc(C)c(C)c(-c2occ3cc4c(cc23)n(-c2ccccc2)c2nccn42)c1	2.714922081271172	1.4601338306776876	2.857923214377022
Cc1cc(C)c(C)c(-c2occ3cc4c(cc23)n(-c2ccccc2)c2nncn42)c1	2.7545057313492944	1.481547318435286	2.89276008251998
Cc1cc(C)c(C)c(-c2occ3cc4c(cnc5ccccc54)nc23)c1	2.7499602404312324	1.3978109931742306	2.7479793369350256
Cc1cc(C)c(C)c(-c2occ3cc4c(cnc5ccncc54)nc23)c1	2.7226872949228613	1.4006874318282363	2.8219677312019504
Cc1cc(C)c(C)c(-c2occ3cc4c(cnc5cnccc54)nc23)c1	2.729126740390116	1.4072393198734716	2.8064669228998085
Cc1cc(C)c(C)c(-c2occ3cc4ncc5ccccc5c4nc23)c1	2.7874605405052435	1.4083579349055848	2.780419172866313
Cc1cc(C)c(C)c(-c2occ3cc4ncc5ccncc5c4nc23)c1	2.7456041449680897	1.4091569456428086	2.840504780305543
Cc1cc(C)c(C)c(-c2occ3cc4ncc5cnccc5c4nc23)c1	2.756778476808325	1.408837341347919	2.813018810945044
Cc1cc(C)c(C)c(-c2onc3cc4cnoc4cc23)c1	2.806210690542249	1.4932128751987537	2.916091196046916
Cc1cc(C)cc(-c2occ3ccccc23)c1	2.912650936206866	1.454061349074787	2.9001109813024395
Cc1ccc(-c2c3cnoc3cc3conc23)c(C)c1C	2.888029527067364	1.50919308994323	2.9386232988366268
Cc1ccc(-c2c3conc3cc3cnoc23)c(C)c1C	2.8653020724770544	1.498326543916986	2.9373448816570686
Cc1ccc(-c2cc3c(c4cocc24)-c2cncn2C3)c(C)c1C	2.719656967644153	1.400847233975681	2.745742106870799
Cc1ccc(-c2cc3c(c4cocc24)CN(c2ccccc2)N3c2ccccc2)c(C)c1C	3.0554551092159783	1.4829855377622887	2.9352674537402867
Cc1ccc(-c2cc3c(c4cocc24)N(c2ccccc2)CO3)c(C)c1C	2.7942787768823365	1.389341479359658	2.8524899413639
Cc1ccc(-c2cc3c(c4cocc24)N(c2ccccc2)N(c2ccccc2)C3)c(C)c1C	2.9120827498421087	1.4655671036908098	2.9309527957592785
Cc1ccc(-c2cc3c(c4cocc24)N(c2ccccc2)N(c2ccccc2)C32C=COC=N2)c(C)c1C	2.975530227240056	1.4981667417695412	2.932710619381171
Cc1ccc(-c2cc3c(cn2)ncc2cc4nocc4cc23)c(C)c1C	2.731967672213905	1.4003678275333469	2.7924043339246696
Cc1ccc(-c2cc3c(oc4cccn43)c3cocc23)c(C)c1C	2.943901186268542	1.5227762724760348	2.995033456884628
Cc1ccc(-c2cc3cocc3c3c2CN(c2ccccc2)N3c2ccccc2)c(C)c1C	3.0037501500230244	1.472758200325824	2.929354774284831
Cc1ccc(-c2cc3cocc3c3c2COc2cncn2-3)c(C)c1C	2.9099993998379965	1.4924138644615297	2.905064847873227
Cc1ccc(-c2cc3cocc3c3c2Cn2cncc2-3)c(C)c1C	2.833294240595701	1.4153892293931545	2.7489381498196943
Cc1ccc(-c2cc3cocc3c3c2oc2cccn23)c(C)c1C	2.900719022546953	1.5139871543665726	2.937185079509624
Cc1ccc(-c2cc3cocc3c3c2on2cncc32)c(C)c1C	2.7166266403654453	1.427054786156622	2.761242915172941
Cc1ccc(-c2cc3cocc3c3oc4cccn4c23)c(C)c1C	2.9988258681951234	1.527090930457043	2.987362953807279
Cc1ccc(-c2cc3oc4cccn4c3c3cocc23)c(C)c1C	2.8084834360012803	1.507754870616227	2.9335096301183943
Cc1ccc(-c2cc3on4ccnc4c3c3cocc23)c(C)c1C	2.701664399426825	1.4462310438499937	2.828359817099741
Cc1ccc(-c2cc3on4cncc4c3c3cocc23)c(C)c1C	2.7022325857915823	1.4200234916690526	2.7661967817437287
Cc1ccc(-c2ccc3c(ncc4cc5nocc5cc43)n2)c(C)c1C	2.7117023585375444	1.3866248428530972	2.812059998060375
Cc1ccc(-c2ccc3ncc4cc5conc5cc4c3n2)c(C)c1C	2.739164699500836	1.4221009195858345	2.7978376069377915
Cc1ccc(-c2ccc3ncc4cc5nocc5cc4c3c2)c(C)c1C	2.707156867619483	1.3808719655450858	2.7489381498196943
Cc1ccc(-c2ccnc3c2cnc2cc4nocc4cc23)c(C)c1C	2.7348086040376924	1.4369625192981972	2.856484995050019
Cc1ccc(-c2cnc3cnc4cc5conc5cc4c3c2)c(C)c1C	2.709240217623595	1.3979707953216751	2.8321950686384154
Cc1ccc(-c2cnc3cnc4cc5nocc5cc4c3c2)c(C)c1C	2.726475204021246	1.3982903996165648	2.8361901223245347
Cc1ccc(-c2cnc3ncc4cc5conc5cc4c3c2)c(C)c1C	2.727232785840923	1.434405684939081	2.813018810945044
Cc1ccc(-c2cnc3ncc4cc5nocc5cc4c3c2)c(C)c1C	2.7132175221768997	1.3869444471479868	2.7984768155275708
Cc1ccc(-c2cncc3c2cnc2cc4conc4cc23)c(C)c1C	2.7224978994679416	1.4043628812194655	2.8489742941201155
Cc1ccc(-c2cncc3ncc4cc5nocc5cc4c23)c(C)c1C	2.743331399509059	1.4260959732719536	2.790167103860443
Cc1ccc(-c2nccc3c2ncc2cc4nocc4cc23)c(C)c1C	2.7395434904106746	1.4032442661873523	2.8037502863932477
Cc1ccc(-c2nccc3ncc4cc5nocc5cc4c23)c(C)c1C	2.724013063107296	1.410914769264701	2.8291588278369653
Cc1ccc(-c2occ3c4c(ccc23)CN(c2ccccc2)N4c2ccccc2)c(C)c1C	2.829695726952236	1.429292016220849	2.823565752676398
Cc1ccc(-c2occ3c4c(ccc23)OCN4c2ccccc2)c(C)c1C	2.756967872263245	1.3652113550954992	2.773228076231298
Cc1ccc(-c2occ3cc4c(cc23)c2cccnc2n4-c2ccccc2)c(C)c1C	2.730831299484388	1.4308900376952962	2.799915034854574
Cc1ccc(-c2occ3cc4c(cc23)c2ccncc2n4-c2ccccc2)c(C)c1C	2.74825568133696	1.439838957952203	2.8198903032851685
Cc1ccc(-c2occ3cc4c(cc23)c2cnccc2n4-c2ccccc2)c(C)c1C	2.7959833359766098	1.450545701831002	2.8524899413639
Cc1ccc(-c2occ3cc4c(cc23)c2cnncc2n4-c2ccccc2)c(C)c1C	2.7063992857998063	1.4393595515098687	2.8448194382865517
Cc1ccc(-c2occ3cc4c(cc23)n(-c2ccccc2)c2cncn42)c(C)c1C	2.7715513222920265	1.496888324589983	2.8996315748601047
Cc1ccc(-c2occ3cc4c(cc23)n(-c2ccccc2)c2nccn42)c(C)c1C	2.7266645994761656	1.4663661144280336	2.8716661990572714
Cc1ccc(-c2occ3cc4c(cc23)n(-c2ccccc2)c2nncn42)c(C)c1C	2.743520794963979	1.4812277141403964	2.887007205211969
Cc1ccc(-c2occ3cc4cnc5ccccc5c4nc23)c(C)c1C	2.746929913152525	1.41155397785448	2.753252807800703
Cc1ccc(-c2occ3cc4ncc5ccccc5c4nc23)c(C)c1C	2.769278576832996	1.404203079072021	2.7775427342123065
Cc1ccc(-c2occ3cc4ncc5cccnc5c4nc23)c(C)c1C	2.75829364044768	1.4181058658997152	2.811420789470596
Cc1ccc(-c2occ3cc4ncc5cnccc5c4nc23)c(C)c1C	2.75052842679599	1.407878528463251	2.8126992066501546
Cc1ccc(C)c(-c2c3cnoc3cc3conc23)c1C	2.88424161796898	1.5045588276673316	2.9368654752147343
Cc1ccc(C)c(-c2c3conc3cc3cnoc23)c1C	2.863976304292619	1.4973677310323177	2.936545870919845
Cc1ccc(C)c(-c2cc3c(c4cocc24)-c2cncn2C3)c1C	2.718899385824476	1.3995688167961229	2.743824481101462
Cc1ccc(C)c(-c2cc3c(c4cocc24)CN(c2ccccc2)N3c2ccccc2)c1C	3.052045991027432	1.4813875162878412	2.935427255887732
Cc1ccc(C)c(-c2cc3c(c4cocc24)N(c2ccccc2)CO3)c1C	2.7927636132429825	1.3879032600326553	2.84913409626756
Cc1ccc(C)c(-c2cc3c(c4cocc24)N(c2ccccc2)N(c2ccccc2)C3)c1C	2.9075372589240462	1.4631700714791382	2.9301537850220543
Cc1ccc(C)c(-c2cc3c(cn2)cnc2cc4conc4cc23)c1C	2.711134172172787	1.3950943566676697	2.834432298702642
Cc1ccc(C)c(-c2cc3c(cn2)cnc2cc4nocc4cc23)c1C	2.741816235869705	1.415708833688044	2.8489742941201155
Cc1ccc(C)c(-c2cc3c(cn2)ncc2cc4nocc4cc23)c1C	2.731778276758985	1.4006874318282363	2.793522948956783
Cc1ccc(C)c(-c2cc3c(oc4cccn43)c3cocc23)c1C	2.9397344862603183	1.5198998338220289	2.9927962268204014
Cc1ccc(C)c(-c2cc3cocc3c3c2C2(C=COC=N2)N(c2ccccc2)N3c2ccccc2)c1C	3.0594324137692825	1.4857021742688497	2.9296743785797204
Cc1ccc(C)c(-c2cc3cocc3c3c2CN(c2ccccc2)N3c2ccccc2)c1C	2.99731070455577	1.4706807724090425	2.932071410791392
Cc1ccc(C)c(-c2cc3cocc3c3c2Cn2ccnc2-3)c1C	2.800718222349591	1.4278537968938458	2.790806312450222
Cc1ccc(C)c(-c2cc3cocc3c3c2Cn2cncc2-3)c1C	2.827422981493205	1.4126725928865935	2.7486185455248044
Cc1ccc(C)c(-c2cc3cocc3c3c2OCN3c2ccccc2)c1C	2.872499099763985	1.393496335193222	2.8456184490237755
Cc1ccc(C)c(-c2cc3cocc3c3c2oc2cccn23)c1C	2.8971205089034875	1.5123891328921253	2.9363860687724004
Cc1ccc(C)c(-c2cc3cocc3c3c2on2cncc32)c1C	2.7183311994597186	1.42497735823984	2.760603706583161
Cc1ccc(C)c(-c2cc3cocc3c3oc4cccn4c23)c1C	2.9933334000024656	1.5240546896555929	2.9862443387751654
Cc1ccc(C)c(-c2cc3cocc3c3on4ccnc4c23)c1C	2.856589881550769	1.4596544242353535	2.8556859843127955
Cc1ccc(C)c(-c2cc3oc4cccn4c3c3cocc23)c1C	2.8048849223578145	1.505198036257111	2.933669432265839
Cc1ccc(C)c(-c2cc3on4ccnc4c3c3cocc23)c1C	2.7014750039719053	1.4455918352602146	2.8253235762982905
Cc1ccc(C)c(-c2cc3on4cncc4c3c3cocc23)c1C	2.701664399426825	1.4163480422778232	2.76523796885906
Cc1ccc(C)c(-c2ccc3c(c2)ncc2cc4conc4cc23)c1C	2.728937344935196	1.429132214073404	2.7685938139554
Cc1ccc(C)c(-c2ccc3c(c2)ncc2cc4nocc4cc23)c1C	2.7037477494309363	1.379273944070638	2.757247861486821
Cc1ccc(C)c(-c2ccc3c(cnc4cc5conc5cc43)n2)c1C	2.7177630130949604	1.4034040683347977	2.846417459760999
Cc1ccc(C)c(-c2ccc3c(cnc4cc5nocc5cc43)n2)c1C	2.726475204021246	1.3995688167961229	2.849293898415005
Cc1ccc(C)c(-c2ccc3c(ncc4cc5conc5cc43)n2)c1C	2.736134372222128	1.4406379686894268	2.830916651458857
Cc1ccc(C)c(-c2ccc3c(ncc4cc5nocc5cc43)n2)c1C	2.713785708541657	1.3877434578852106	2.814297228124602
Cc1ccc(C)c(-c2ccc3cnc4cc5conc5cc4c3c2)c1C	2.719088781279396	1.3978109931742306	2.7890484888283296
Cc1ccc(C)c(-c2ccc3cnc4cc5conc5cc4c3n2)c1C	2.7266645994761656	1.3978109931742306	2.82899902568952
Cc1ccc(C)c(-c2ccc3cnc4cc5nocc5cc4c3c2)c1C	2.7312100903942267	1.4000482232384577	2.7956003768735647
Cc1ccc(C)c(-c2ccc3cnc4cc5nocc5cc4c3n2)c1C	2.731967672213905	1.4395193536573134	2.8475360747931124
Cc1ccc(C)c(-c2ccc3ncc4cc5conc5cc4c3c2)c1C	2.724770644926973	1.427054786156622	2.75852627866638
Cc1ccc(C)c(-c2ccc3ncc4cc5conc5cc4c3n2)c1C	2.741058654050028	1.423059732470503	2.8005542434443527
Cc1ccc(C)c(-c2ccc3ncc4cc5nocc5cc4c3c2)c1C	2.7067780767096448	1.3805523612501964	2.7468607219029124
Cc1ccc(C)c(-c2ccc3ncc4cc5nocc5cc4c3n2)c1C	2.719846363099073	1.418904876636939	2.7984768155275708
Cc1ccc(C)c(-c2cccc3c2ncc2cc4conc4cc23)c1C	2.727043390386004	1.4260959732719536	2.75852627866638
Cc1ccc(C)c(-c2cccc3c2ncc2cc4nocc4cc23)c1C	2.7122705449023026	1.3811915698399757	2.7481391390824705
Cc1ccc(C)c(-c2cccc3ncc4cc5nocc5cc4c23)c1C	2.7183311994597186	1.404203079072021	2.7401490317102324
Cc1ccc(C)c(-c2ccnc3c2cnc2cc4conc4cc23)c1C	2.725149435836812	1.3923777201611085	2.8355509137347554
Cc1ccc(C)c(-c2ccnc3c2cnc2cc4nocc4cc23)c1C	2.73537679040245	1.437122321445642	2.855366380017906
Cc1ccc(C)c(-c2ccnc3ncc4cc5conc5cc4c23)c1C	2.7484450767918784	1.4412771772792057	2.821488324759616
Cc1ccc(C)c(-c2ccnc3ncc4cc5nocc5cc4c23)c1C	2.726285808566327	1.412193186444259	2.8069463293421437
Cc1ccc(C)c(-c2cnc3c(c2)ncc2cc4conc4cc23)c1C	2.740869258595109	1.4206627002588317	2.8056679121625843
Cc1ccc(C)c(-c2cnc3c(c2)ncc2cc4nocc4cc23)c1C	2.7128387312670608	1.4123529885917037	2.8016728584764654
Cc1ccc(C)c(-c2cnc3c(cnc4cc5conc5cc43)c2)c1C	2.725149435836812	1.3944551480778906	2.8293186299844093
Cc1ccc(C)c(-c2cnc3c(cnc4cc5nocc5cc43)c2)c1C	2.7253388312917304	1.433766476349302	2.8475360747931124
Cc1ccc(C)c(-c2cnc3cnc4cc5conc5cc4c3c2)c1C	2.7098084039883523	1.3984502017640097	2.831396057901192
Cc1ccc(C)c(-c2cnc3cnc4cc5nocc5cc4c3c2)c1C	2.7266645994761656	1.3989296082063438	2.8368293309143136
Cc1ccc(C)c(-c2cnc3ncc4cc5conc5cc4c3c2)c1C	2.727232785840923	1.4347252892339706	2.811740393765485
Cc1ccc(C)c(-c2cnc3ncc4cc5nocc5cc4c3c2)c1C	2.713406917631818	1.3863052385582075	2.7968787940531232
Cc1ccc(C)c(-c2cncc3c2cnc2cc4conc4cc23)c1C	2.7226872949228613	1.4058011005464686	2.846577261908444
Cc1ccc(C)c(-c2cncc3c2cnc2cc4nocc4cc23)c1C	2.7313994858491464	1.4022854533026838	2.849933107004784
Cc1ccc(C)c(-c2cncc3c2ncc2cc4conc4cc23)c1C	2.741816235869705	1.439838957952203	2.8379479459464263
Cc1ccc(C)c(-c2cncc3c2ncc2cc4nocc4cc23)c1C	2.719088781279396	1.388222864327545	2.8206893140223928
Cc1ccc(C)c(-c2cncc3ncc4cc5conc5cc4c23)c1C	2.7524223813451827	1.435843904266084	2.790806312450222
Cc1ccc(C)c(-c2cncc3ncc4cc5nocc5cc4c23)c1C	2.744467772238574	1.4272145883040668	2.7876102695013265
Cc1ccc(C)c(-c2nc3cc4cocc4nc3c3ccncc23)c1C	2.8653020724770544	1.437761530035421	2.7976778047903466
Cc1ccc(C)c(-c2nc3nc4cocc4cc3n2-c2ccccc2)c1C	2.88651436342801	1.5123891328921253	2.941339935343188
Cc1ccc(C)c(-c2nccc3c2cnc2cc4conc4cc23)c1C	2.714732685816253	1.3949345545202247	2.8406645824529875
Cc1ccc(C)c(-c2nccc3c2cnc2cc4nocc4cc23)c1C	2.748634472246798	1.4166676465727126	2.856005588607685
Cc1ccc(C)c(-c2nccc3c2ncc2cc4conc4cc23)c1C	2.734429813127854	1.42833320333618	2.806307120752364
Cc1ccc(C)c(-c2nccc3c2ncc2cc4nocc4cc23)c1C	2.7389753040459164	1.4029246618924631	2.8011934520341315
Cc1ccc(C)c(-c2nccc3cnc4cc5conc5cc4c23)c1C	2.737838931316401	1.4147500208033752	2.84913409626756
Cc1ccc(C)c(-c2nccc3ncc4cc5conc5cc4c23)c1C	2.759240617722276	1.4454320331127697	2.8449792404339966
Cc1ccc(C)c(-c2nccc3ncc4cc5nocc5cc4c23)c1C	2.7234448767425383	1.4120333842968142	2.828200014952296
Cc1ccc(C)c(-c2occ3c2ccc2c3oc3cncn32)c1C	2.981590881797472	1.5178224059052468	2.9440565718497487
Cc1ccc(C)c(-c2occ3c2ccc2oc4cncn4c23)c1C	2.8870825497927672	1.50919308994323	2.943896769702304
Cc1ccc(C)c(-c2occ3c2ccc2oc4nccn4c23)c1C	2.8861355725181714	1.51590478013591	2.9450153847344174
Cc1ccc(C)c(-c2occ3c4c(ccc23)CN(c2ccccc2)N4c2ccccc2)c1C	2.915870658940493	1.447829065324441	2.9095393080016803
Cc1ccc(C)c(-c2occ3c4c(ccc23)OCN4c2ccccc2)c1C	2.8064000859971685	1.375918098974298	2.811420789470596
Cc1ccc(C)c(-c2occ3cc4c(cc23)N=CCN4c2ccccc2)c1C	3.097311504753132	1.5008833782761022	2.927437148515493
Cc1ccc(C)c(-c2occ3cc4c(cc23)c2cccnc2n4-c2ccccc2)c1C	2.7791271404887965	1.4427153966062087	2.8093433615538146
Cc1ccc(C)c(-c2occ3cc4c(cc23)c2ccncc2n4-c2ccccc2)c1C	2.8181426042021616	1.4575769963185714	2.833153881523084
Cc1ccc(C)c(-c2occ3cc4c(cc23)c2cnccc2n4-c2ccccc2)c1C	2.84636252698513	1.4612524457098013	2.8652741131594808
Cc1ccc(C)c(-c2occ3cc4c(cc23)c2cncnc2n4-c2ccccc2)c1C	2.762649735910822	1.4433546051959878	2.8938786975520934
Cc1ccc(C)c(-c2occ3cc4c(cc23)c2cnncc2n4-c2ccccc2)c1C	2.7885969132347586	1.4618916542995803	2.8740632312689427
Cc1ccc(C)c(-c2occ3cc4c(cc23)n(-c2ccccc2)c2ccnn42)c1C	2.814354695103777	1.4877796021856318	2.900270783449884
Cc1ccc(C)c(-c2occ3cc4c(cc23)n(-c2ccccc2)c2cncn42)c1C	2.820415349661193	1.5075950684687822	2.923122490534485
Cc1ccc(C)c(-c2occ3cc4c(cc23)n(-c2ccccc2)c2nccn42)c1C	2.768899785923157	1.4762738475696089	2.901868804924331
Cc1ccc(C)c(-c2occ3cc4c(cnc5ncccc54)nc23)c1C	2.724202458562215	1.4005276296807916	2.797518002642902
Cc1ccc(C)c(-c2occ3cc4c(ncn4-c4ccccc4)nc23)c1C	2.768520995013319	1.480268901255728	2.901229596334552
Cc1ccc(C)c(-c2occ3cc4cnc5ccncc5c4nc23)c1C	2.731778276758985	1.41826566804716	2.845298844728886
Cc1ccc(C)c(-c2occ3cc4cnc5ncccc5c4nc23)c1C	2.7431420040541403	1.419863689521608	2.819570698990279
Cc1ccc(C)c(-c2occ3cc4cnn5cncc5c4cc23)c1C	2.733293440398339	1.3553036219539238	2.7561292464547087
Cc1ccc(C)c(-c2occ3cc4ncc5cnccc5c4nc23)c1C	2.748823867701717	1.4050020898092448	2.8107815808808168
Cc1ccc(C)c(-c2occ3cc4ncc5ncccc5c4nc23)c1C	2.751475404070587	1.4045226833669109	2.826601993477849
Cc1ccc(C)c(-c2occ3nc4c(cc23)ncc2cnccc24)c1C	2.734429813127854	1.4064403091362478	2.812859008797599
Cc1ccc(C)c(-c2occ3nc4c(cnc5ccncc54)cc23)c1C	2.736134372222128	1.429771422663183	2.8523301392164555
Cc1ccc(C)c(-c2occ3nc4c(cnc5cnccc54)cc23)c1C	2.735755581312289	1.4259361711245089	2.792564136072114
Cc1ccc(C)c(-c2occ3nc4cnc5ncccc5c4cc23)c1C	2.709619008533433	1.4005276296807916	2.7983170133801254
